# Supplementary material
Source: MDPI journal article supplement (https://www.mdpi.com/2313-0105/4/1/8)
Supplement: s1 [file s1]

# High-Performance $\text{Na}_{0.44}\text{MnO}_2$ Slabs for Sodium-Ion Batteries Obtained through Urea-Based Solution Combustion Synthesis.

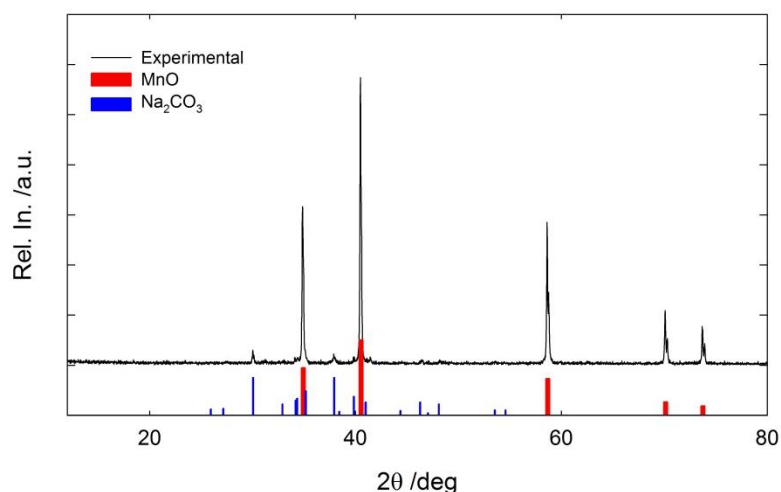

**Figure S1.** XRD of the NMO sample after a thermal treatment at 800 °C under  $\text{N}_2$  flux, showing the degradation of the sample into  $\text{Mn}_2\text{O}_3$  and  $\text{Na}_2\text{CO}_3$ .

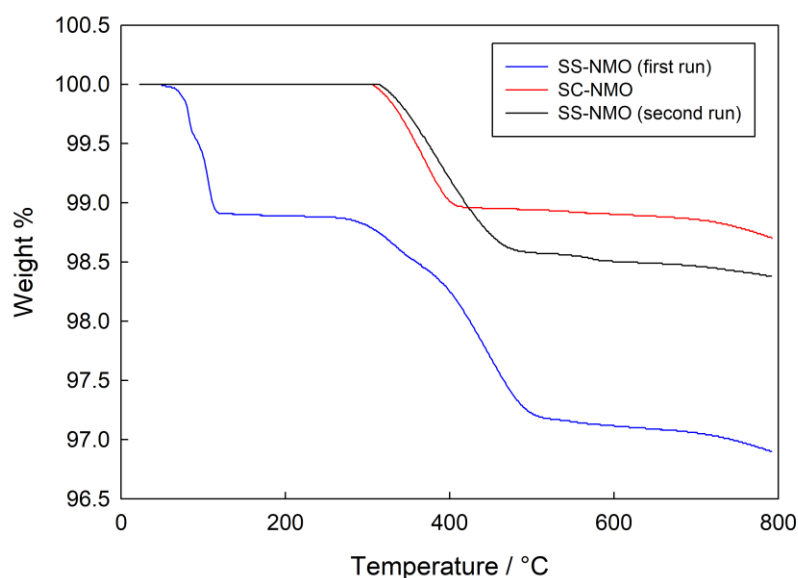

**Figure S2.** Thermogravimetric analysis of the SS- and SC-NMO powders in the T range comprised between room temperature and 800 °C.
